# Supplementary material
Source: PubMed Central journal article supplement (PMC7348094)
Supplement: BPH-177-3519-s001.pdf [file BPH-177-3519-s001.pdf]

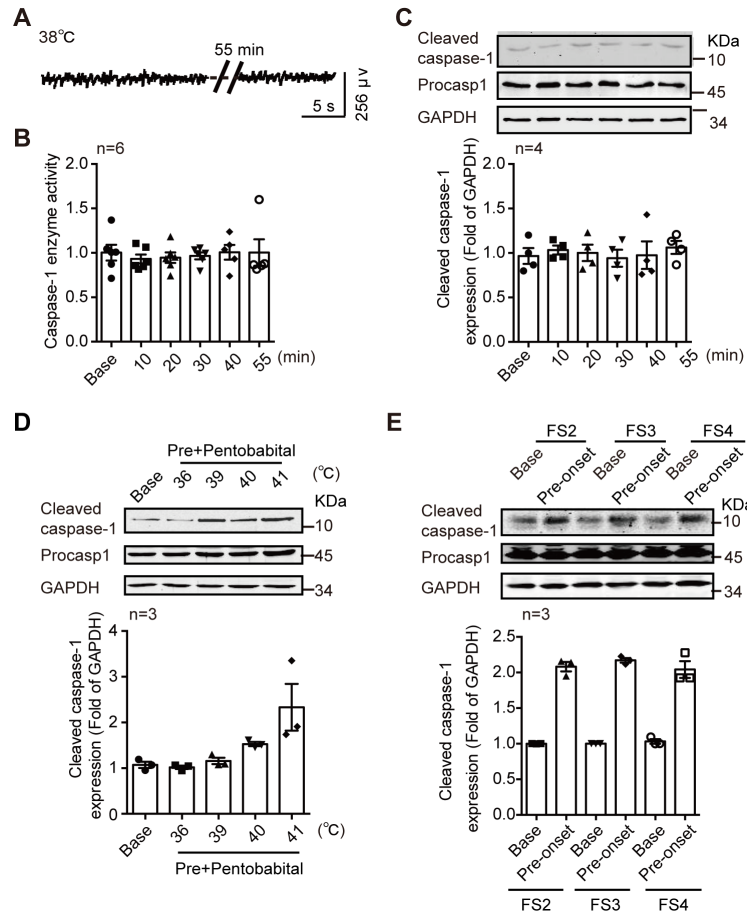

**Supplementary Figure 1. Fever, but not seizure, increases the expression of cleaved caspase-1.** (A) Typical EEG of FS onset under 38°C condition. (B) The enzyme activity of caspase-1 at different time points under 38°C condition. (C) The amount of caspase-1 at different time points under 38°C condition was analyzed by western blotting with indicated antibodies. Data were quantified and normalized against the base. (D) Hippocampus samples of indicated body temperature were analyzed by western blotting with indicated antibodies in mice with pentobarbital pretreatment, and data were quantified and normalized with the base. (E) The level of cleaved caspase-1 increased prior to recurrence FS. Hippocampus samples were analyzed by western blotting, and data were quantified and normalized with the base. Data are presented as means  $\pm$  s.e.m..

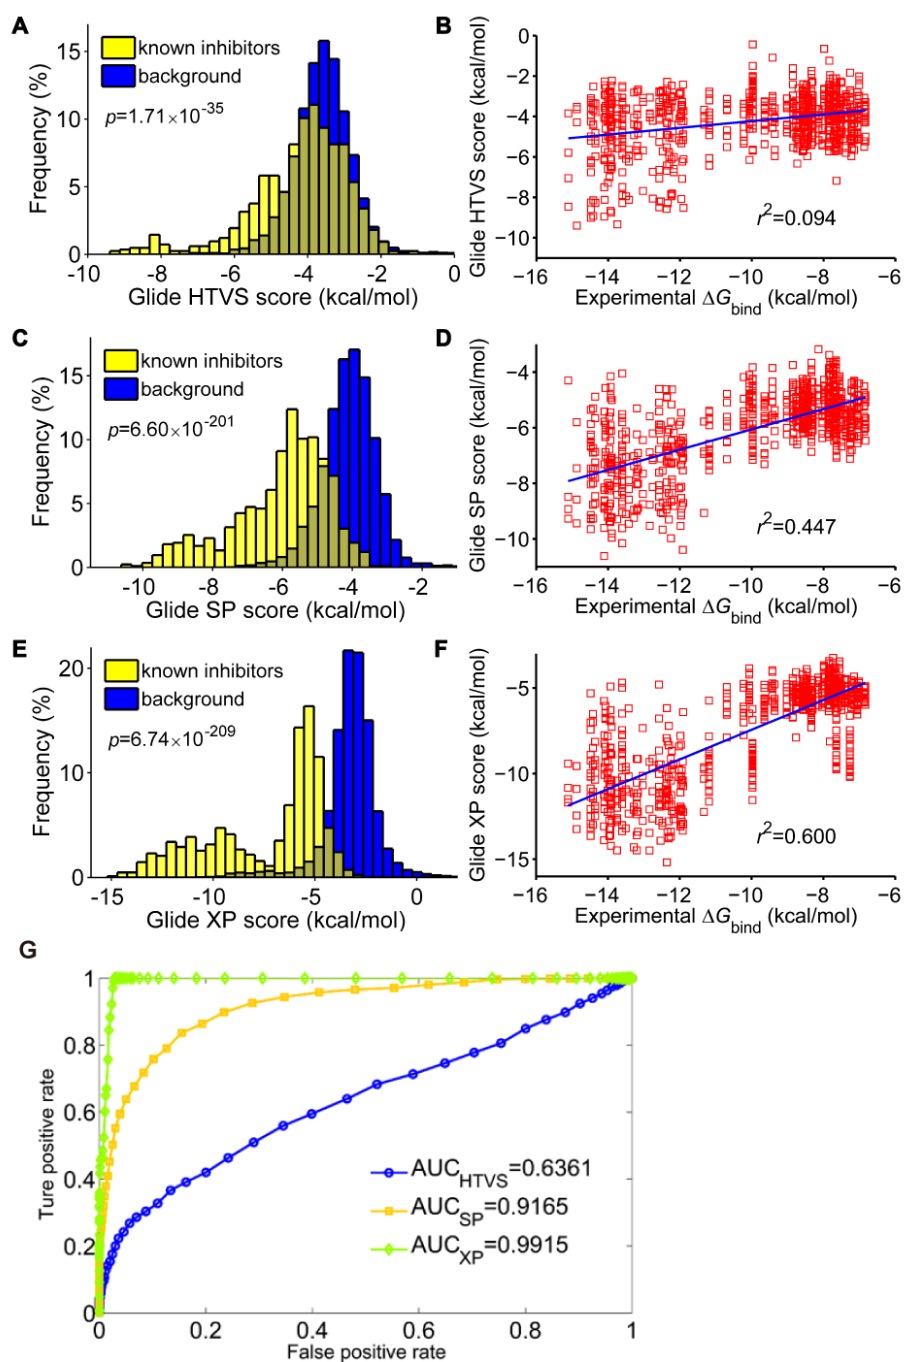

**Supplementary Figure 2. Validation of different docking approaches on the test dataset.** (A-F) The distribution of the known inhibitors and chemical background (non-inhibitors) are illustrated in panels A, C, and E for glide HTVS docking (High Throughput Virtual Screening), glide SP docking (Standard Precision), and glide XP docking (Extra Precision), respectively. The corresponding Pearson correlation coefficients are shown in panels B, D, and F, respectively. **Actives set:** A total of 824

known inhibitors (with  $IC_{50} < 10 \mu M$ ) were collected from the BindingDB database.

**Inactives set:** To mimic the fact that few compounds can exhibit activity to a certain target, 17,000 compounds randomly chosen from the ChemBridge database were used as the non-inhibitors, making the ratio of inhibitors and non-inhibitors 1:20. These molecules have the maximum diversity evaluated by the 2-D similarities (Tanimoto coefficient) based on the FCFP\_4 fingerprints in the Find Diverse Molecules module in Discovery Studio 2.5, and thereafter can represent a real chemical background. **(G)** ROC curves of different docking methods. The ROC curves of HTVS, SP, and XP docking methods on the test dataset are shown in blue cycle line, orange square line, and green diamond line, respectively,

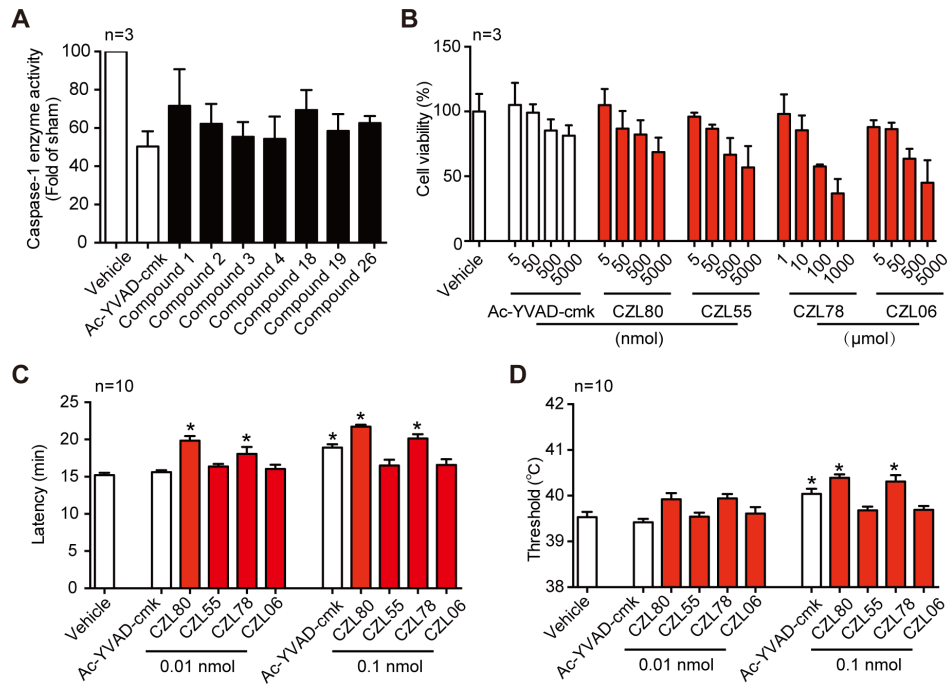

**Supplementary Figure 3. Screening the top-ranked compounds *in vitro* and *in vivo*.**

(A) The enzyme activity of caspase-1 of the selected 7 compounds and Ac-YVAD-cmk on LPS-pretreated PBMCs compared with the sham group. (B) Cell viability following administration of four indicated compounds and Ac-YVAD-cmk tested by MTT. (C-D) The latency (C) and threshold (D) of FS generation in WT mice treated with vehicle, Ac-YVAD-cmk, CZL80, CZL55, CZL78, and CZL06 (0.01 nmol and 0.1 nmol, *i.c.v.*). Data are presented as means  $\pm$  s.e.m.. \* $P < 0.05$ , One-way ANOVA followed by Dunnett *post hoc* test was used for C, D.

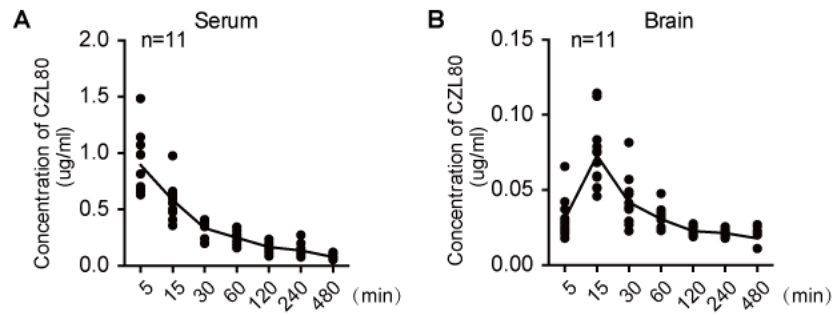

**Supplementary Figure 4. CZL80 penetrates the BBB. (A and B)** Concentration of CZL80 in serum (**A**) and brain (**B**) were measured at 5, 15, 30, 60, 120, 240, 480 min after CZL80 (0.75 mg/kg) was administered intravenously.

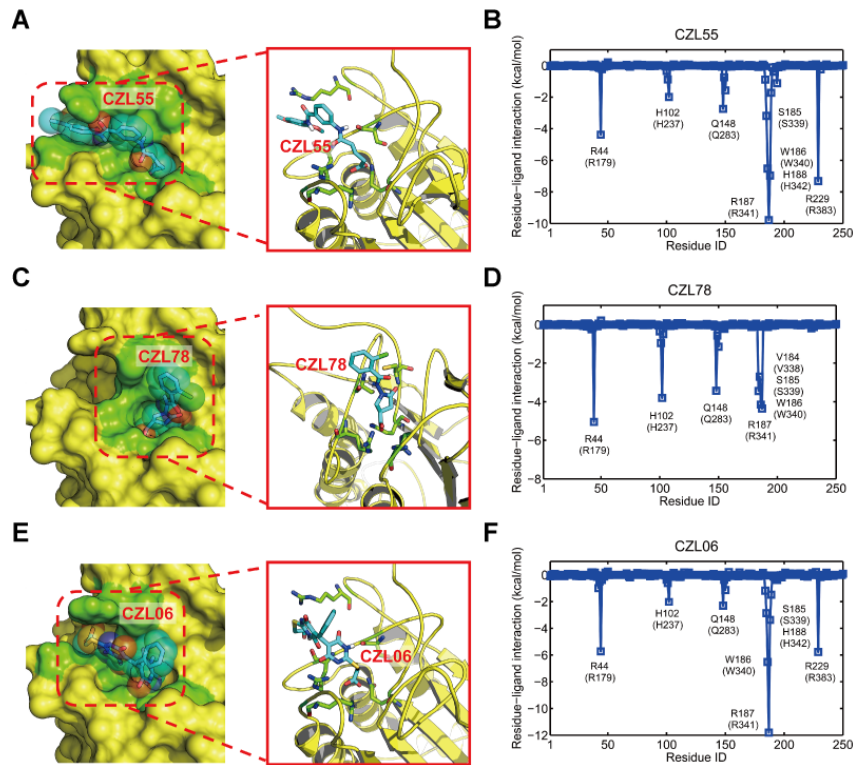

**Supplementary Figure 5. Structural and energetic representations of the 3 compounds (CZL55, CZL78, and CZL06) interacting with caspase-1. (A, C, E)** The solvent-accessible surfaces of the 3 compounds to the binding pocket of caspase-1. **(B, D, F)** The corresponding hydrogen bond networks of the 3 compounds to the binding pocket of caspase-1. The compounds, the key residues, and the protein backbones are shown in cyan stick model, green stick model, and yellow cartoon model, respectively.

## Supplementary Tables

**Supplementary Table 1. Detailed information of the selected 50 compounds obtained and tested in bioassays.**

| ID          | IC <sub>50</sub> (μM) | Score <sup>a</sup> | MW <sup>b</sup> | ClogP <sup>c</sup> | LogS <sup>d</sup> | Caspase-1 enzyme activity (Fold of Sham) | Rank <sup>e</sup> |
|-------------|-----------------------|--------------------|-----------------|--------------------|-------------------|------------------------------------------|-------------------|
| CZL80       | 0.010                 | -11.5398           | 365.39          | 3.22               | -4.621            | 38.14±9.21***                            | 7                 |
| CZL55       | 0.024                 | -10.5803           | 385.4           | 1.63               | -3.409            | 53.81±3.02**                             | 48                |
| CZL78       | 3.742                 | -10.7835           | 281.678         | 0.55               | -1.732            | 58.88±1.92*                              | 33                |
| Compound 1  | 46.03                 | -12.0615           | 429.862         | 3.33               | -5.185            | 56.51±1.59*                              | 2                 |
| Compound 2  | 46.28                 | -10.8508           | 339.374         | 2.534              | -3.846            | 57.38±4.39*                              | 30                |
| Compound 3  | 100.6                 | -10.6441           | 375.792         | 0.41               | -2.297            | 58.59±3.92*                              | 40                |
| Compound 4  | 153.8                 | -11.0186           | 438.397         | 1.5                | -3.691            | 59.74±4.73*                              | 21                |
| CZL06       | 11.31                 | -11.3766           | 489.465         | 3.19               | -5.119            | 54.48±2.90**                             | 8                 |
| Compound 5  | -                     | -10.6586           | 189.982         | 0.839              | -1.311            | 91.89±3.56                               | 38                |
| Compound 6  | -                     | -11.9513           | 446.468         | 1.26               | -3.538            | 96.06±2.72                               | 3                 |
| Compound 7  | -                     | -10.5369           | 330.343         | 2.53               | -3.77             | 94.15±1.17                               | 52                |
| Compound 8  | -                     | -10.6414           | 341.347         | 2.39               | -3.737            | 92.83±1.23                               | 41                |
| Compound 9  | -                     | -10.9581           | 255.315         | 1.97               | -2.752            | 97.10±2.00                               | 24                |
| Compound 10 | -                     | -10.5766           | 352.433         | 4.32               | -5.466            | 94.78±2.45                               | 49                |
| Compound 11 | -                     | -11.2351           | 401.402         | 4.6                | -6.327            | 93.50±1.90                               | 12                |
| Compound 12 | -                     | -11.185            | 299.239         | -3.05              | -0.862            | 92.9±2.53                                | 15                |
| Compound 13 | -                     | -11.6575           | 420.338         | 4.78               | -6.751            | 93.74±1.69                               | 6                 |
| Compound 14 | -                     | -10.5924           | 283.67          | 0.98               | -2.121            | 95.15±2.23                               | 46                |
| Compound 15 | -                     | -10.6024           | 317.281         | 0.74               | -2.153            | 92.26±1.16                               | 45                |
| Compound 16 | -                     | -10.9598           | 327.296         | 2.55               | -3.779            | 94.94±2.33                               | 23                |
| Compound 17 | -                     | -10.7602           | 311.122         | -2.14              | 0.506             | 77.08±19.55                              | 35                |
| Compound 18 | -                     | -10.757            | 359.792         | 1.69               | -3.274            | 48.98±4.10***                            | 36                |
| Compound 19 | -                     | -10.5105           | 349.775         | 1.43               | -2.979            | 48.61±2.78***                            | 58                |
| Compound 20 | -                     | -10.7535           | 357.776         | 1.75               | -3.31             | 90.86±2.17                               | 37                |
| Compound 21 | -                     | -10.4968           | 455.495         | 5.1                | -7.148            | 91.93±1.05                               | 59                |
| Compound 22 | -                     | -10.5298           | 459.954         | 4.23               | -6.172            | 97.54±1.65                               | 53                |
| Compound 23 | -                     | -10.9201           | 479.467         | 4.41               | -6.468            | 94.94±1.06                               | 26                |
| Compound 24 | -                     | -11.2813           | 469.519         | 3.08               | -5.26             | 95.94±1.43                               | 10                |
| Compound 25 | -                     | -10.9369           | 438.427         | 4.13               | -5.93             | 84.89±2.63                               | 25                |
| Compound 26 | -                     | -10.8375           | 387.438         | 3.7                | -5.192            | 57.30±4.52*                              | 31                |
| Compound 27 | -                     | -10.8673           | 491.346         | 5.33               | -7.34             | 86.73±13.27                              | 28                |
| Compound 28 | -                     | -11.2215           | 351.362         | 1.068              | -2.482            | 74.03±16.98                              | 13                |
| Compound 29 | -                     | -10.6029           | 447.394         | 3.622              | -6.7              | 91.86±4.23                               | 44                |
| Compound 30 | -                     | -10.5834           | 363.353         | 2.515              | -3.901            | 82.11±8.41                               | 47                |
| Compound 31 | -                     | -10.8958           | 277.236         | 1.358              | -2.416            | 92.53±2.78                               | 27                |
| Compound 32 | -                     | -10.4713           | 422.424         | 5.509              | -6.318            | 93.23±1.77                               | 61                |
| Compound 33 | -                     | -10.862            | 493.352         | 2.439              | -4.886            | 92.74±2.78                               | 29                |
| Compound 34 | -                     | -12.3631           | 503.452         | 3.881              | -6.191            | 95.28±4.65                               | 1                 |
| Compound 35 | -                     | -10.5465           | 262.244         | 0.957              | -1.938            | 95.20±2.41                               | 50                |
| Compound 36 | -                     | -11.1631           | 328.348         | 2.62               | -3.839            | 74.57±5.36                               | 16                |
| Compound 37 | -                     | -11.2671           | 371.395         | 2.82               | -4.323            | 85.09±9.05                               | 11                |
| Compound 38 | -                     | -10.8281           | 341.368         | 2.271              | -3.636            | 90.84±0.99                               | 32                |
| Compound 39 | -                     | -10.5192           | 326.356         | 1.885              | -2.222            | 91.50±5.77                               | 57                |
| Compound 40 | -                     | -11.2069           | 353.401         | 3.897              | -5.112            | 90.87±7.17                               | 14                |
| Compound 41 | -                     | -10.6249           | 456.953         | 4.357              | -6.259            | 86.51±10.67                              | 43                |
| Compound 42 | -                     | -10.4667           | 507.302         | 3.19               | -5.629            | 60.33±25.64                              | 64                |
| Compound 43 | -                     | -11.776            | 370.41          | 3.324              | -4.747            | 62.97±21.21                              | 5                 |
| Compound 44 | -                     | -11.1201           | 445.886         | 4.857              | -6.87             | 89.04±10.40                              | 18                |
| Compound 45 | -                     | -11.3567           | 277.299         | -0.381             | -2.215            | 83.19±10.38                              | 9                 |
| Compound 46 | -                     | -10.5244           | 314.324         | 0.503              | -1.929            | 76.77±11.18                              | 54                |

<sup>a</sup>Glide-XP docking score; <sup>b</sup>Molecular weight; <sup>c</sup>Predicted octanol/water partition coefficient;

<sup>d</sup>Predicted aqueous solubility, *S* in mol/L; <sup>e</sup>Ranks of the molecule based on glide XP docking score.

**Supplementary Table 2. H-bond occupancy details in each active compound.**

| Donor                 | Acceptor      | Occupancy <sup>a</sup> | Donor          | Acceptor      | Occupancy |
|-----------------------|---------------|------------------------|----------------|---------------|-----------|
| <b>CZL80</b>          |               |                        | <b>CZL55</b>   |               |           |
| <b>R179-Sidechain</b> | CZL80         | 224.00% <sup>b</sup>   | R179-Sidechain | CZL55         | 271.00%   |
| <b>R341-Sidechain</b> | CZL80         | 108.00%                | R341-Sidechain | CZL55         | 132.00%   |
| <b>Q283-Sidechain</b> | CZL80         | 83.00%                 | Q283-Sidechain | CZL55         | 84.00%    |
| <b>R383-Sidechain</b> | CZL80         | 69.00%                 | R383-Sidechain | CZL55         | 52.00%    |
| <b>CZL80</b>          | R341-Backbone | 5.00%                  | CZL55          | R341-Backbone | 58.00%    |
|                       |               |                        | CZL55          | S339-Backbone | 67.00%    |
|                       |               |                        | S339-Sidechain | CZL55         | 6.00%     |
|                       |               |                        | R341-Backbone  | CZL55         | 17.00%    |
| <b>CZL78</b>          |               |                        | <b>CZL06</b>   |               |           |
| <b>R179-Sidechain</b> | CZL78         | 256.00%                | R179-Sidechain | CZL06         | 280.00%   |
| <b>R341-Sidechain</b> | CZL78         | 167.00%                | R341-Sidechain | CZL06         | 197.00%   |
| <b>Q283-Sidechain</b> | CZL78         | 83.00%                 | Q283-Sidechain | CZL06         | 92.00%    |
| <b>CZL78</b>          | S339-Backbone | 10.00%                 | R383-Sidechain | CZL06         | 69.00%    |
| <b>C285-Backbone</b>  | CZL78         | 5.00%                  | CZL06          | S339-Backbone | 46.00%    |
| <b>C285-Sidechain</b> | CZL78         | 15.00%                 | CZL06          | R341-Backbone | 12.00%    |
|                       |               |                        | R341-Backbone  | CZL06         | 90.00%    |
|                       |               |                        | W340-Sidechain | CZL06         | 23.00%    |

<sup>a</sup>H-bond occupancy was calculated based on 30 ns MD trajectory; <sup>b</sup>H-bond occupancy >100% means that more than one hydrogen bond were formed between the donor and the acceptor.



**Supplementary Table 3. Binding free energy of the four tight-binding compounds.**

|       | $\Delta H$                     | $-T\Delta S$     | $\Delta G_{\text{bind}}$ | IC <sub>50</sub> ( $\mu\text{M}$ ) |
|-------|--------------------------------|------------------|--------------------------|------------------------------------|
| CZL80 | -34.90 $\pm$ 0.39 <sup>a</sup> | 13.54 $\pm$ 3.20 | -21.36 $\pm$ 0.39        | 0.0072                             |
| CZL55 | -48.70 $\pm$ 0.46              | 30.31 $\pm$ 1.49 | -18.39 $\pm$ 0.46        | 0.024                              |
| CZL78 | -32.17 $\pm$ 0.46              | 16.32 $\pm$ 1.85 | -15.85 $\pm$ 0.46        | 3.742                              |
| CZL06 | -40.37 $\pm$ 0.58              | 26.07 $\pm$ 1.93 | -14.30 $\pm$ 0.58        | 11.31                              |

<sup>a</sup>Deviations were estimated by two blocks (block1 1~15 ns; block2 15~30 ns).
